# Supplementary material for: Handheld methanol detector for beverage analysis: interlaboratory validation
Source: Royal Society of Chemistry journal article supplement (doi:10.1039/d4ay00919c), 2024-01-01
Supplement: d4ay00919c1.pdf [file d4ay00919c1.pdf]

## Supporting Information

### Handheld Methanol Detector for Beverage Analysis: Interlaboratory Validation

Jan van den Broek<sup>1\*</sup>, Sebastian D. Keller<sup>1</sup>, Ian Goodall<sup>2</sup>, Katie Parish-Virtue<sup>2</sup>, Claudia Bauer-Christoph<sup>3</sup>, Johannes Fuchs<sup>3</sup>, Despina Tsipi<sup>4</sup>, Andreas T. Güntner<sup>5</sup>, Thomas Blum<sup>6</sup>, Jean-Charles Mathurin<sup>7</sup>, Matthias G. Steiger<sup>8</sup>, Roghayeh Shirvani<sup>8</sup>, Manfred Gössinger<sup>9</sup>, Monika Graf<sup>9</sup>, Peter Anderhub<sup>10</sup>, Daniel Z'graggen<sup>11</sup>, Claudio Hüscher<sup>12</sup>, Benjamin Faigle<sup>13</sup>, Agapiou Agapios<sup>14</sup>

<sup>1</sup>Alivion AG, CH-8152 Glattbrugg, Switzerland

<sup>2</sup>Scotch Whisky Research Institute, UK-EH144AP Riccarton, UK

<sup>3</sup> Bayerisches Landesamt für Gesundheit und Lebensmittelsicherheit, DE-97082 Würzburg, Germany

<sup>4</sup>General Chemical State Laboratory, GR-11521 Athens, Greece

<sup>5</sup>Human-centered Sensing Laboratory, ETH Zürich, CH-8092 Zürich, Switzerland

<sup>6</sup>Research Division Food Microbial Systems, Agroscope, CH-8820 Wädenswil, Switzerland

<sup>7</sup>E. Rémy Martin & Co, FR-16100 Mersins, France

<sup>8</sup>Institute of Chemical, Environmental and Bioscience Engineering, Research Group Biochemistry, TU Wien, AT-1060 Vienna, Austria

<sup>9</sup>Department of Fruit Processing, Federal College and Research Institute for Viticulture and Pomology Klosterneuburg, AT-3400 Klosterneuburg, Austria

<sup>10</sup>S. Fassbind AG, CH-6414 Oberarth, Switzerland

<sup>11</sup>Z'GRAGGEN Distillerie AG, CH-6424 Lauerz, Switzerland

<sup>12</sup>Etter Soehne AG, CH-6300 Zug, Switzerland

<sup>13</sup>Destillerie Freihof GmbH, AT-6890 Lustenau, Austria

<sup>14</sup>Department of Chemistry, University of Cyprus, CY-1678 Nicosia, Cyprus

\*corresponding author: [jan.vandenbroek@alivion.ch](mailto:jan.vandenbroek@alivion.ch)

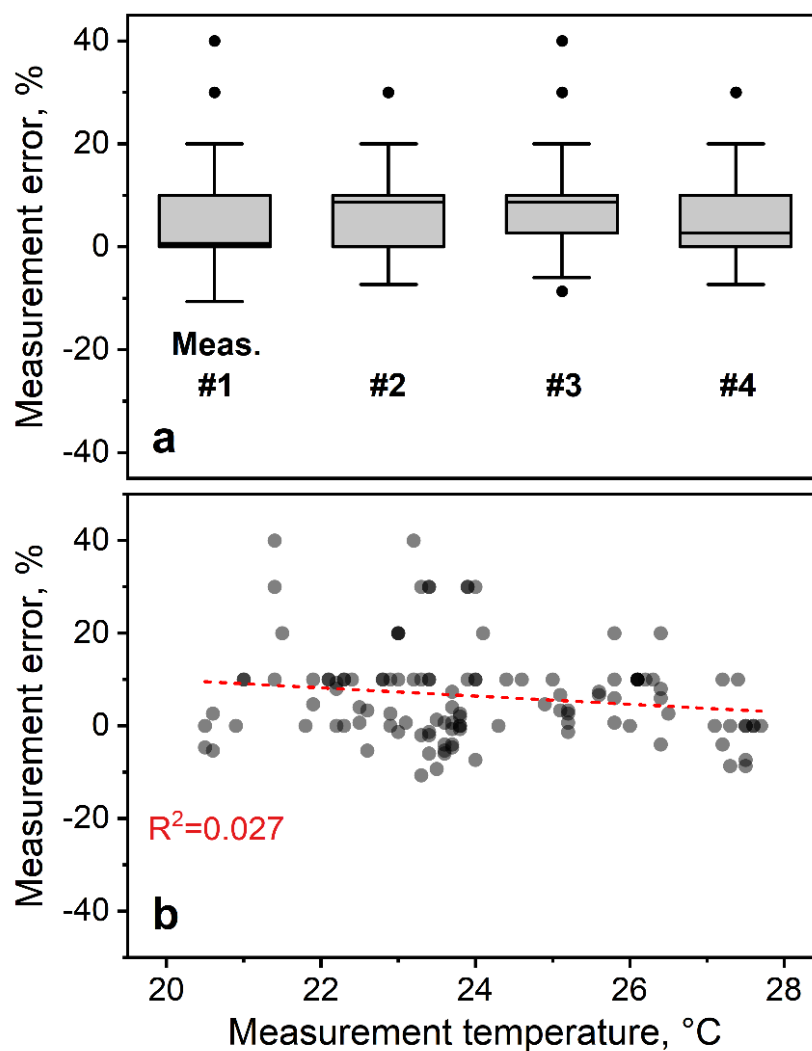

**Fig. S1** Measurement error of the detector for all samples categorized (a) by the replicate number and (b) as a function of temperature. Boxes in (a) represent median, 25 and 75% quartiles. Whiskers indicate 1.5-times interquartile distance. In (b), also the linear fit (dashed red line) through all measurements and its corresponding  $R^2$  are shown.

**Table S1** List of all participants in the interlaboratory trial.

| <b>Institution</b>                                                                                    | <b>Type</b>       | <b>Country</b> | <b>Participants</b> |
|-------------------------------------------------------------------------------------------------------|-------------------|----------------|---------------------|
| E. Rémy Martin & Co                                                                                   | Distiller         | France         | 1                   |
| Etter Soehne AG                                                                                       | Distiller         | Switzerland    | 1                   |
| General Chemical State Laboratory (GCSL)                                                              | Authority         | Greece         | 2                   |
| ETH Zürich, Human-centered Sensing Laboratory                                                         | University        | Switzerland    | 2                   |
| University of Cyprus, Department of Chemistry                                                         | University        | Cyprus         | 1                   |
| Destillerie Freihof GmbH                                                                              | Distiller         | Austria        | 1                   |
| S. Fassbind AG                                                                                        | Distiller         | Switzerland    | 1                   |
| Federal College and Research Institute for Viticulture and Pomology Klosterneuburg                    | Competence center | Austria        | 1                   |
| Bayerisches Landesamt für Gesundheit und Lebensmittelsicherheit (LGL)                                 | Authority         | Germany        | 1                   |
| TU Wien, Research Group Biochemistry, Institute of Chemical, Environmental and Bioscience Engineering | University        | Austria        | 1                   |
| Scotch Whisky Research Institute                                                                      | Competence center | Scotland       | 2                   |
| Agroscope, Swiss Confederation's center of excellence for agricultural research                       | Competence center | Switzerland    | 2                   |
| Z'GRAGGEN Destillerie AG                                                                              | Distiller         | Switzerland    | 1                   |

**Table S2** Results of individual repeat measurement of the 1.5/40 sample level as measured by the detector, as well as their mean and standard deviation.

| Participant     | Repeat Measurement |      |      |      | Mean,<br>vol% | Standard<br>deviation,<br>vol% |
|-----------------|--------------------|------|------|------|---------------|--------------------------------|
|                 | #1                 | #2   | #3   | #4   |               |                                |
| 1               | 1.51               | 1.48 | 1.54 | 1.55 | 1.52          | 0.032                          |
| 2               | 1.62               | 1.64 | 1.56 | 1.47 | 1.57          | 0.076                          |
| 3               | 1.50               | 1.43 | 1.42 | 1.54 | 1.47          | 0.057                          |
| 4*              | 1.36               | 1.51 | 1.60 | 1.72 | 1.55          | 0.152                          |
| 5               | 1.51               | 1.56 | 1.61 | 1.53 | 1.55          | 0.043                          |
| 6               | 1.49               | 1.44 | 1.43 | 1.39 | 1.44          | 0.041                          |
| 7               | 1.55               | 1.57 | 1.65 | 1.60 | 1.59          | 0.043                          |
| 8               | 1.49               | 1.51 | 1.54 | 1.52 | 1.52          | 0.021                          |
| 9*              | 1.49               | 1.58 | 1.71 | 1.76 | 1.64          | 0.123                          |
| 10              | 1.37               | 1.39 | 1.37 | 1.44 | 1.39          | 0.033                          |
| 11              | 1.34               | 1.47 | 1.41 | 1.48 | 1.43          | 0.065                          |
| 12              | 1.57               | 1.65 | 1.55 | 1.51 | 1.57          | 0.059                          |
| 13 <sup>+</sup> | 1.62               | 1.57 | 1.48 | 1.71 | 1.62          | 0.096                          |
| 14              | 1.51               | 1.42 | 1.54 | 1.48 | 1.49          | 0.051                          |
| 15              | 1.51               | 1.60 | 1.61 | 1.59 | 1.58          | 0.046                          |
| 16              | 1.44               | 1.62 | 1.59 | 1.54 | 1.55          | 0.079                          |
| 17              | 1.36               | 1.44 | 1.41 | 1.42 | 1.41          | 0.034                          |

<sup>+</sup> Results rejected as measurements not performed under repeatability conditions.

\* Rejected stragglers according to the Cochran (variance outliers) test.

**Table S3** Results of individual repeat measurement of the 0.1/40 sample level as measured by the detector, as well as their mean and standard deviation.

| Participant     | Repeat Measurement |      |      |      | Mean,<br>vol% | Standard<br>deviation,<br>vol% |
|-----------------|--------------------|------|------|------|---------------|--------------------------------|
|                 | #1                 | #2   | #3   | #4   |               |                                |
| 1               | 0.10               | 0.11 | 0.11 | 0.10 | 0.11          | 0.006                          |
| 2               | 0.10               | 0.10 | 0.11 | 0.11 | 0.11          | 0.006                          |
| 3               | 0.10               | 0.11 | 0.11 | N/A  | 0.11          | 0.006                          |
| 4               | 0.11               | 0.10 | 0.11 | 0.10 | 0.11          | 0.006                          |
| 5               | 0.11               | 0.11 | 0.11 | 0.11 | 0.11          | 0.000                          |
| 6*              | 0.11               | 0.12 | 0.14 | 0.13 | 0.13          | 0.013                          |
| 7               | 0.12               | 0.11 | 0.10 | 0.11 | 0.11          | 0.008                          |
| 8               | 0.10               | 0.11 | 0.11 | 0.11 | 0.11          | 0.005                          |
| 9               | 0.11               | 0.11 | 0.11 | 0.10 | 0.11          | 0.005                          |
| 10              | 0.11               | 0.11 | 0.12 | 0.10 | 0.11          | 0.008                          |
| 11              | 0.14               | 0.13 | 0.13 | 0.13 | 0.13          | 0.005                          |
| 12              | 0.10               | 0.11 | 0.11 | 0.11 | 0.11          | 0.005                          |
| 13 <sup>+</sup> | 0.12               | 0.10 | 0.11 | 0.10 | 0.11          | 0.010                          |
| 14              | 0.13               | 0.13 | 0.12 | 0.13 | 0.13          | 0.005                          |
| 15              | 0.11               | 0.11 | 0.11 | 0.11 | 0.11          | 0.000                          |
| 16              | 0.10               | 0.10 | 0.10 | 0.10 | 0.10          | 0.000                          |
| 17              | 0.12               | 0.11 | 0.12 | 0.12 | 0.12          | 0.005                          |

<sup>+</sup> Results rejected as measurements not performed under repeatability conditions.

\* Retained stragglers according to the Cochran (variance outliers) test

## **Standard measurement method «Methanol measurement in liquids by use of the Alivion Spark M-20»**

This measurement method describes the measurement of methanol content in water- and alcohol-containing liquids by use of the Alivion Spark M-20 measurement instrument.

In general, the instructions in the operating manual and the quick start guide must be followed for all measurements. In addition, the following points must be observed:

- The measurements must be performed in a room (measuring room) with low air contamination and constant temperature ( $<1\text{ }^{\circ}\text{C/h}$ ).
- The measuring instrument, accessories (calibration standards, sample vials and pipettes) as well as sample liquids should be stored in the measuring room for at least 3 hours before the measurement is carried out in order to guarantee constant temperatures. For sample liquids in large containers  $>100\text{ mL}$ , this time must be adjusted upwards as required.
- Samples should be stored in closed inert containers (e.g. glass) to ensure the composition does not change until the measurement.
- The measuring instrument must be switched on 15-30 minutes before performing the first measurement.
- The measuring instrument must be calibrated with a 2-point calibration directly before performing a series of measurements.
- Calibrations and measurements must be performed only when no warnings are displayed on the display:
  - CAL warning: The device must be recalibrated.
  - TEM warning: The temperature in the measuring room is not constant.
  - CON warning: The background air is contaminated.
- Used measuring accessories (sample vials and pipettes) must be disposed of in a sealed container (e.g. plastic bag) or outside the measuring room immediately after sampling.
- Liquid samples must always be resealed immediately after sampling.
- The result displayed by the measuring instrument (2 decimal places) is regarded as the measurement result.
